# Supplementary material for: Gas permeation properties of hollow glass-crystalline microspheres
Source: Royal Society of Chemistry journal article supplement (doi:10.1039/c3ra47909a), 2014-01-01
Supplement: c3ra47909a1.pdf [file c3ra47909a1.pdf]

## Gas permeation properties of hollow glass-crystalline microspheres

Elena V. Fomenko,<sup>\*a</sup> Elena S. Rogovenko<sup>a</sup>, Leonid A. Solovyov<sup>a</sup> and Alexander G. Anshits<sup>a,b</sup>

<sup>a</sup> Institute of Chemistry and Chemical Technology, Siberian Branch of the Russian Academy of Sciences, Akademgorodok 50/24, Krasnoyarsk, 660036 Russia. Fax: +7 391 249 41 08.; Tel: +7 391 243 93 17; E-mail: fom@icct.ru

<sup>b</sup> Siberian Federal University, Svobodny pr. 79, Krasnoyarsk, 660041 Russia. Fax: 7 391 243 31 94; Tel: +7 391 243 94 31; E-mail: anshits@icct.ru

### I. Experimental Section

#### Determination of permeability of hollow glass-crystalline microspheres

The permeability of hollow glass-crystalline microspheres to helium, hydrogen, and neon was measured in a vacuum apparatus (Fig. S1) at a pressure of  $3 \cdot 10^4$  Pa in the temperature range from 298 to 623 K for helium and from 553 to 773 K for hydrogen and neon under the conditions of diffusion of the gases from the reactor volume into globules.

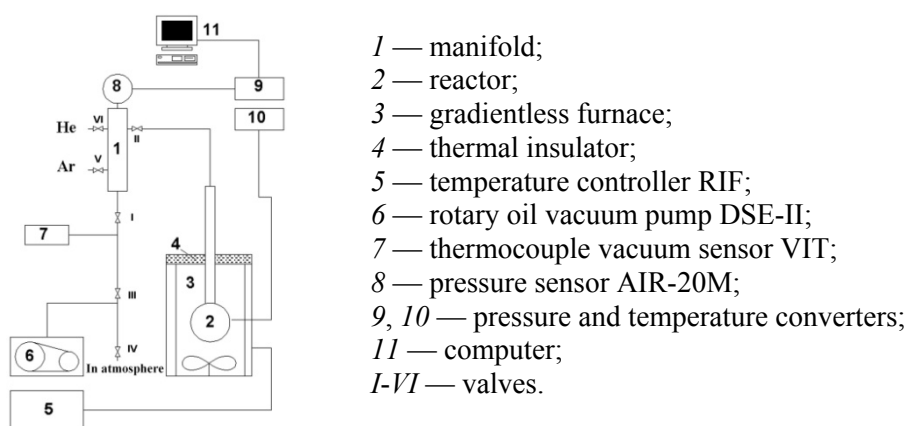

**Fig. S1.** Schematic diagram of apparatus for measurements of glass-crystalline microspheres permeability.

A sample (1-2 g) was placed in a reactor (2). The reactor was heated in a gradientless furnace (3). A thermal insulator (4) was used for separating the reactor volume into zones with different temperatures. The temperature control was achieved using a chromel-alumel thermocouple with a temperature converters IRT-2-T (10). The reactor (2) filled with the sample was evacuated to a residual pressure of approximately 4 Pa. Then, a manifold (1) was filled with a gas, the pressure of the gas was determined, and the reactor (2) was again filled with the gas. The pressure measurement was carried out using a pressure sensor (8) with the simultaneous recording of the results on a computer (11). The pressure sensor (8) was AIR-20M, from which data were continuously recorded with a frequency of approximately 2 Hz. The reading and recording of the pressure values were implemented using the «Genesis» software environment operating together with «Master OPC». The processing of the results of measurements was performed with the «Matlab» software program.

The diffusion of gases through the microsphere shells occurs as a result of the difference between the gas partial pressures outside and inside the globules. The calculation of the gas permeability  $Q$  [mol/(Pa·s·g)] is based on the measurement of the pressure drop time-dependence after the gas injection into the reactor filled with the sample:

$$Q = dP/dt(V_0/T_0 + V_p/T_1)/P_{out} \cdot R, \quad (S1.1)$$

where  $V_0$  is the volume of the manifold [L],  $T_0$  is the room temperature [K],  $V_p$  is the reactor volume [L],  $T_1$  is the temperature of the reactor [K],  $P_{out}$  is the gas pressure outside the particles at an instant of time  $t$  [Pa], and  $R = 8.314$  (Pa·L)/(mol·K) is the universal gas constant. The relative error in the determination of the permeability of microsphere membranes does not exceed 10%.

The activation energy  $E_a$  of gas diffusion through the microsphere shells in the temperature range under investigation was calculated by the least squares method using the dependence of  $\ln Q$  on  $1/T$ .

The calculation of the glass phase permeability coefficient  $K$  [(mol·m)/(m<sup>2</sup>·s·Pa)] for the microsphere shells, which is based on the basic equation for gas diffusion through a membrane, was carried out according to the formula

$$K = (Q \cdot \delta \cdot 100) / (S \cdot C), \quad (\text{S1.2})$$

where  $Q$  is the gas permeability of microsphere shells [mol/(Pa·s·g)];  $\delta$  is the apparent shell thickness [m],  $S$  is the geometrical surface of the sample particles, which is calculated as the sum of the surfaces of identical spheres with diameter  $D_{av}$  [m<sup>2</sup>/g]; and  $C$  is the glass phase content according to the quantitative X-ray powder diffraction analysis data [wt %].

## II. Characterization of hollow glass-crystalline microspheres

**Table S1.** Chemical composition of hollow glass-crystalline microspheres (wt %)

| Sample  | LOI  | SiO <sub>2</sub> | Al <sub>2</sub> O <sub>3</sub> | Fe <sub>2</sub> O <sub>3</sub> | CaO   | MgO  | Na <sub>2</sub> O | K <sub>2</sub> O | SO <sub>3</sub> | P <sub>2</sub> O <sub>5</sub> | B <sub>2</sub> O <sub>3</sub> |
|---------|------|------------------|--------------------------------|--------------------------------|-------|------|-------------------|------------------|-----------------|-------------------------------|-------------------------------|
| H-0.08  | 0.62 | 60.92            | 25.92                          | 3.40                           | 1.63  | 2.31 | 1.18              | 3.55             | 0.21            | 0.09                          | 0                             |
| HM-M-5A | 0.82 | 58.26            | 32.08                          | 2.80                           | 1.27  | 1.15 | 0.72              | 2.39             | 0.27            | 0.08                          | 0                             |
| HM-P-5A | 0.06 | 58.12            | 36.63                          | 0.80                           | 1.54  | 1.22 | 0.63              | 0.56             | 0.21            | 0.08                          | 0                             |
| 3M K37  | 0    | 70.62            | 0.12                           | 0                              | 13.67 | 0.63 | 5.40              | 0.01             | 0.29            | 0.08                          | 8.90                          |

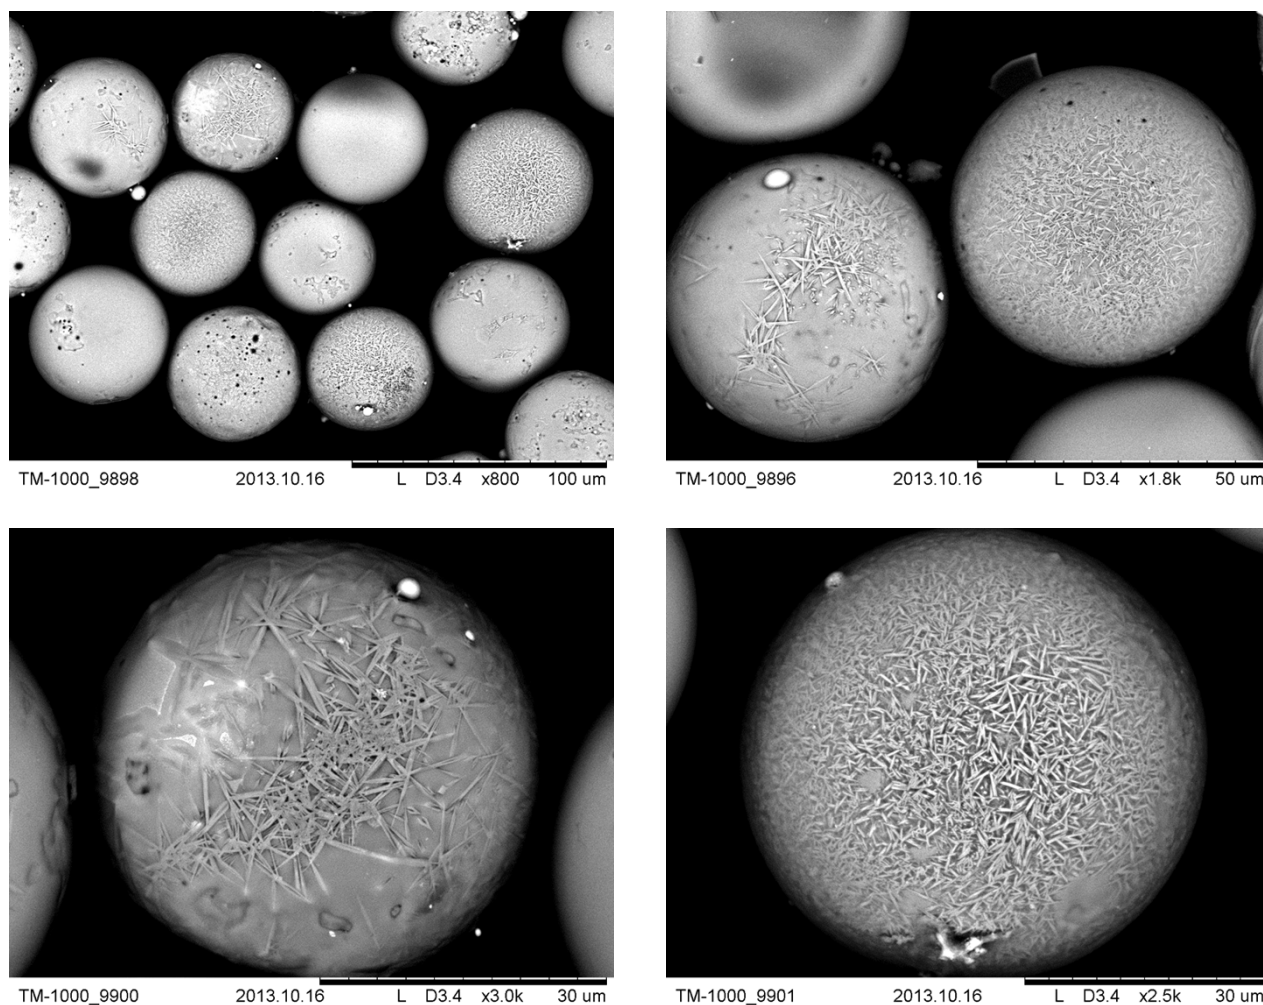

**Fig. S2.** SEM images of cenospheres HM-P-5A 1273 K, O<sub>2</sub>

**Table S2.** Lattice parameters (Å) and crystallite size ( $D_V$ , nm) of mullite phase in cenospheres

| Sample | Mullite(0) | Mullite(I) |
|--------|------------|------------|
|--------|------------|------------|

|                                                                  | <i>a</i>  | <i>b</i>  | <i>c</i>  | <i>D<sub>V</sub></i> | <i>a</i>  | <i>B</i>  | <i>c</i>  | <i>D<sub>V</sub></i> |
|------------------------------------------------------------------|-----------|-----------|-----------|----------------------|-----------|-----------|-----------|----------------------|
| Initial cenospheres                                              |           |           |           |                      |           |           |           |                      |
| HM-M-5A                                                          | 7.5671(3) | 7.6911(3) | 2.8873(1) | 143                  | -         | -         | -         | -                    |
| HM-P-5A                                                          | 7.5611(2) | 7.6913(2) | 2.8885(1) | 122                  | -         | -         | -         | -                    |
| Cenospheres after thermal treatment in different gas atmospheres |           |           |           |                      |           |           |           |                      |
| HM-M-5A 1273 K, O <sub>2</sub>                                   | 7.5655(3) | 7.6894(2) | 2.8871(1) | 143                  | 7.572(1)  | 7.7131(9) | 2.8929(2) | 24                   |
| HM-P-5A 1273 K, O <sub>2</sub>                                   | 7.5607(2) | 7.6908(2) | 2.8879(1) | 122                  | 7.572(3)  | 7.715(3)  | 2.8948(9) | 31                   |
| HM-P-5A 1373 K, O <sub>2</sub>                                   | 7.5619(3) | 7.6914(2) | 2.8884(1) | 122                  | 7.567(2)  | 7.717(3)  | 2.8917(8) | 27                   |
| HM-M-5A 1273 K, Ar                                               | 7.5651(4) | 7.6893(3) | 2.8862(1) | 143                  | 7.5513(7) | 7.6993(6) | 2.8879(1) | 43                   |
| HM-M-5A 1273 K, Ar<br>1273 K, O <sub>2</sub>                     | 7.5639(4) | 7.6886(3) | 2.8871(1) | 143                  | 7.5531(6) | 7.7034(4) | 2.8908(1) | 44                   |

**Table S3.** Permeability coefficient of glass phase and activation energy of gas diffusion in hollow glass-crystalline microspheres

| Sample                                       | Mullite content<br>(wt %) | Permeability coefficient of glass phase x10 <sup>19</sup><br>(mol·m)/(m <sup>2</sup> ·s·Pa) |                            |                 |                 |                            |                 | Activation energy<br>(kJ/mol) |                            |                 |    |
|----------------------------------------------|---------------------------|---------------------------------------------------------------------------------------------|----------------------------|-----------------|-----------------|----------------------------|-----------------|-------------------------------|----------------------------|-----------------|----|
|                                              |                           | 298 K                                                                                       |                            |                 | 553 K           |                            |                 | 673 K                         |                            |                 |    |
|                                              |                           | K <sub>He</sub>                                                                             | K <sub>H<sub>2</sub></sub> | K <sub>Ne</sub> | K <sub>He</sub> | K <sub>H<sub>2</sub></sub> | K <sub>Ne</sub> | K <sub>He</sub>               | K <sub>H<sub>2</sub></sub> | K <sub>Ne</sub> |    |
| 3M K37                                       | 0                         | 0.44                                                                                        | 210                        | 2.8             | 0.46            | 763                        | 23              | 3.3                           | 33                         | 54              | 51 |
| H-0.08                                       | 3.7                       | 0.95                                                                                        | 626                        | ND              | 5.0             | 2079                       | ND              | 18                            | 31                         | ND              | 34 |
| HM-M-5A                                      | 8.4                       | 2.4                                                                                         | 682                        | 24.7            | 3.2             | 2198                       | 118             | 17                            | 30                         | 40              | 43 |
| HM-P-5A                                      | 30.1                      | 13.7                                                                                        | 1759                       | 52.6            | 5.4             | 5001                       | 248             | 36                            | 26                         | 40              | 49 |
| HM-M-5A 1273 K, O <sub>2</sub>               | 30.4                      | 16.5                                                                                        | 1915                       | 90.7            | 11.0            | 5263                       | 285             | 73                            | 26                         | 30              | 49 |
| HM-P-5A 1273 K, O <sub>2</sub>               | 37.2                      | 34.4                                                                                        | 3005                       | 104             | 12.7            | 7473                       | ND              | 75                            | 24                         | 25              | 46 |
| HM-P-5A 1373 K, O <sub>2</sub>               | 48.4                      | 62.0                                                                                        | 6554                       | 203             | 29.7            | 17287                      | 662             | 149                           | 25                         | 30              | 42 |
| HM-M-5A 1273 K, Ar                           | 29.8                      | 6.6                                                                                         | 1226                       | 49.3            | 6.4             | 3643                       | 207             | 36                            | 28                         | 37              | 44 |
| HM-M-5A 1273 K,<br>Ar 1273 K, O <sub>2</sub> | 33.0                      | 8.1                                                                                         | 1322                       | 72.2            | 8.0             | 3821                       | 202             | 47                            | 27                         | 27              | 45 |

ND: Not detected

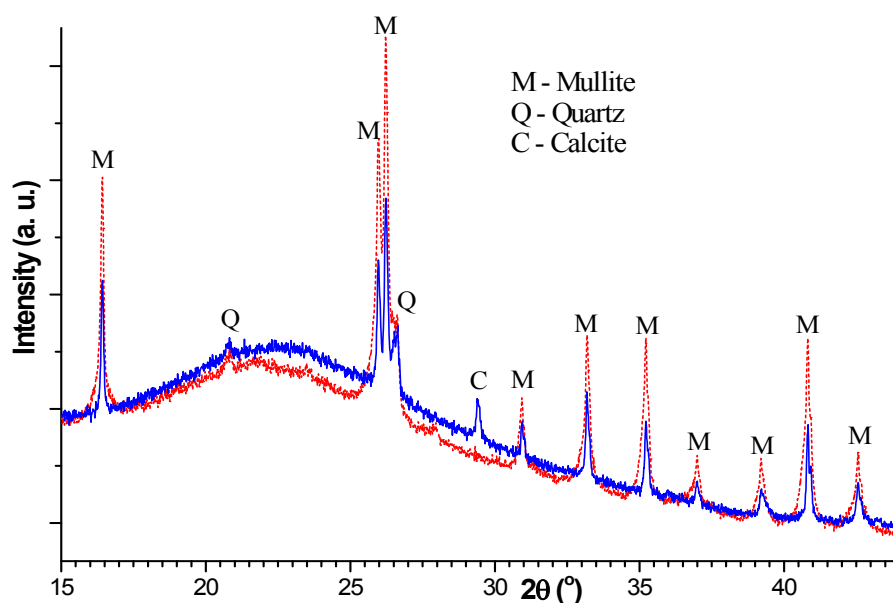

**Fig. S3.** XRD patterns of sample HM-M-5A before (solid blue) and after (red dashed) thermal treatment in O<sub>2</sub>.

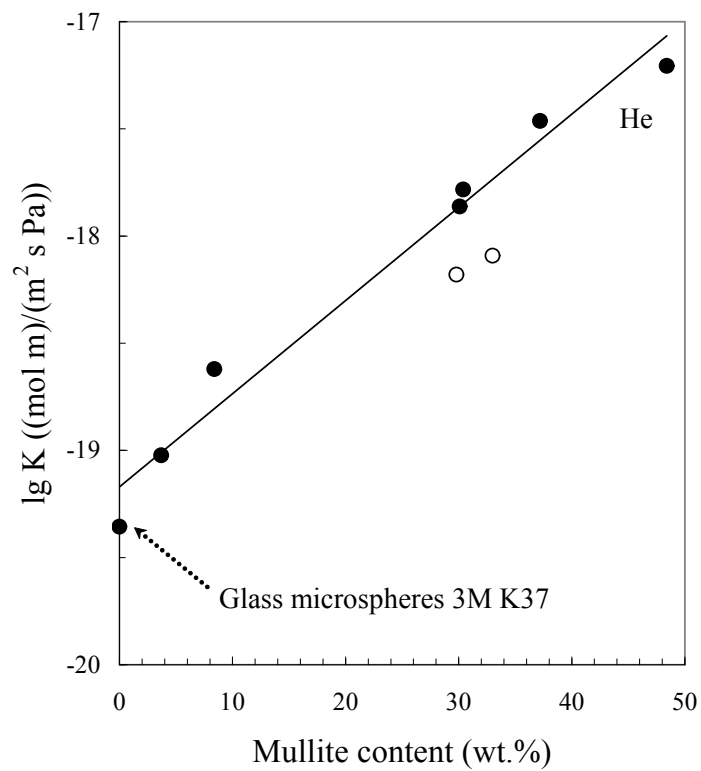

**Fig. S4.** Dependences of glass phase permeability of hollow glass-crystalline microspheres to He at 298 K on the content of mullite formed during thermal treatment in O<sub>2</sub> (closed symbols ) and Ar (open symbols).
